# Supplementary material
Source: publisher figshare collection journal article supplement (https://frontiersin.figshare.com/ndownloader/files/30792610)
Supplement: Supplementary file [file 30792610]

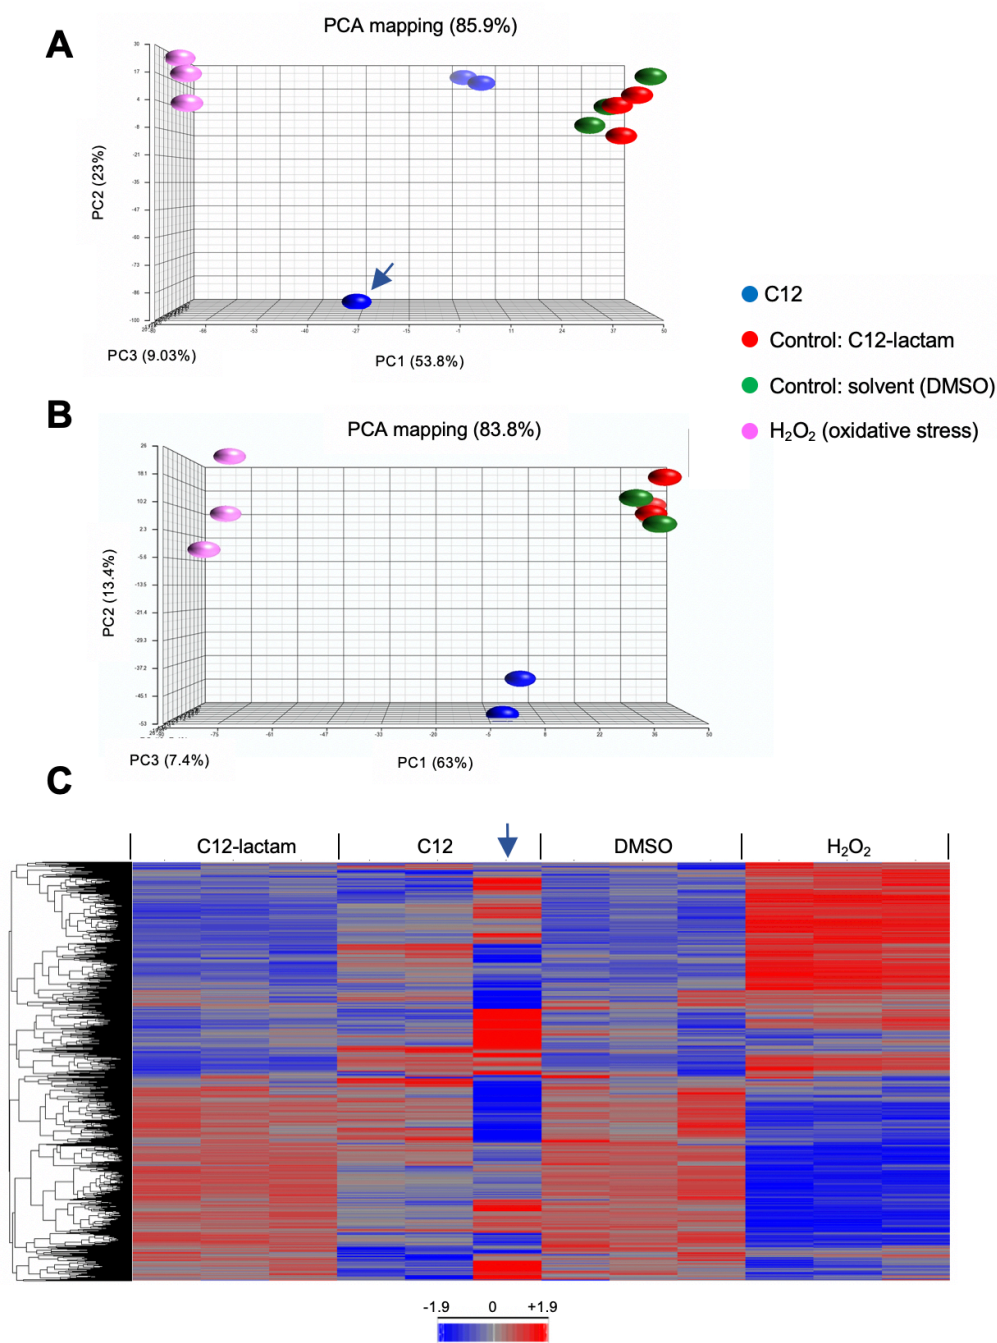

**Fig. S1. Initial microarray analysis.** (A) PCA analysis of the samples showed similarity between the two control treatments (solvent control and C12-lactam). The hydrogen peroxide treatment clustered distinctly from the C12 treatment. Of the C12 samples, one sample from the biological triplicates appeared as an outlier in the PCA analysis (marked with a blue arrow), and was therefore removed from subsequent analysis, as shown in (B). (C). Hierarchical clustering using Pearson dissimilarity metric of all signals (filtered for max signal over 5, after Z-scoring). The outlier sample removed from analysis is marked with a blue arrow.
